# Supplementary material
Source: Springer Nature journal article supplement (https://www.springermedizin.de/resource/supplementary/13054_2012_1039_MOESM3_ESM.pdf/9709826)

1 = most influential; 5 = least influential

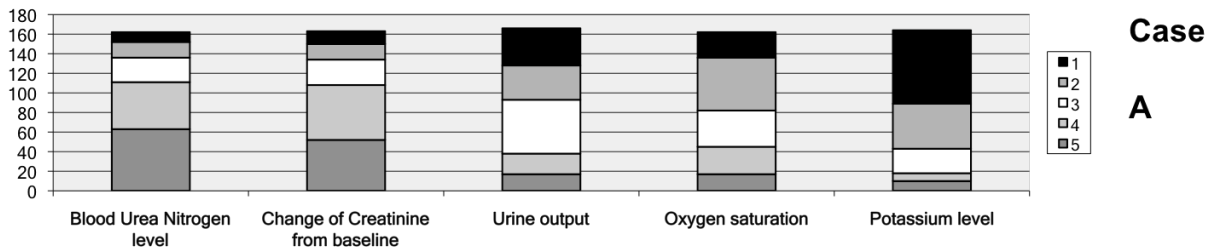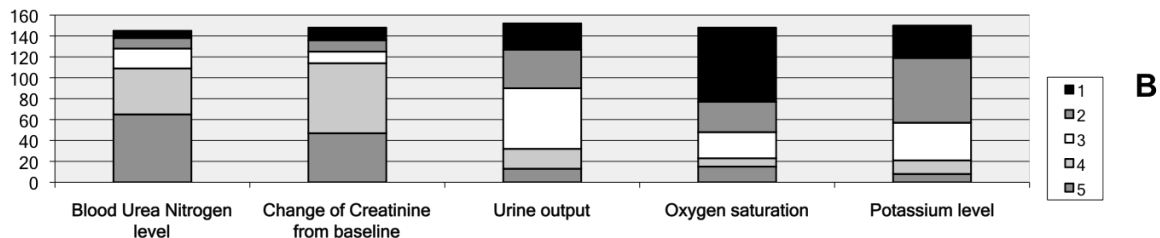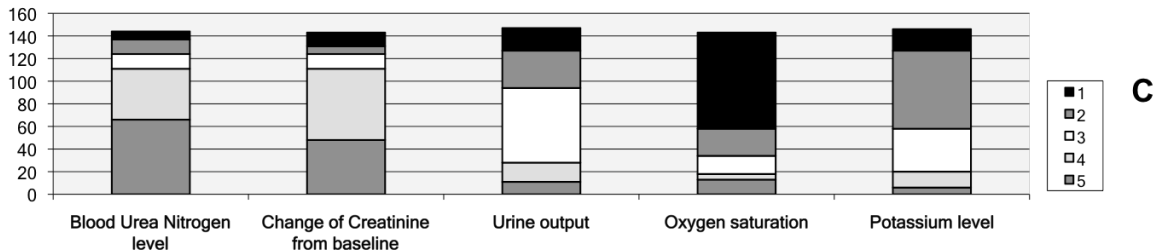

Supplement: MOESM3 [file 9709826]
